# Supplementary material for: Genome-wide DNA methylation is predictive of outcome in juvenile myelomonocytic leukemia
Source: PubMed Central journal article supplement (PMC5736624; doi:10.1038/s41467-017-02178-9), 2017-12-19
Supplement: 41467_2017_2178_MOESM1_ESM.pdf [file 41467_2017_2178_MOESM1_ESM.pdf]

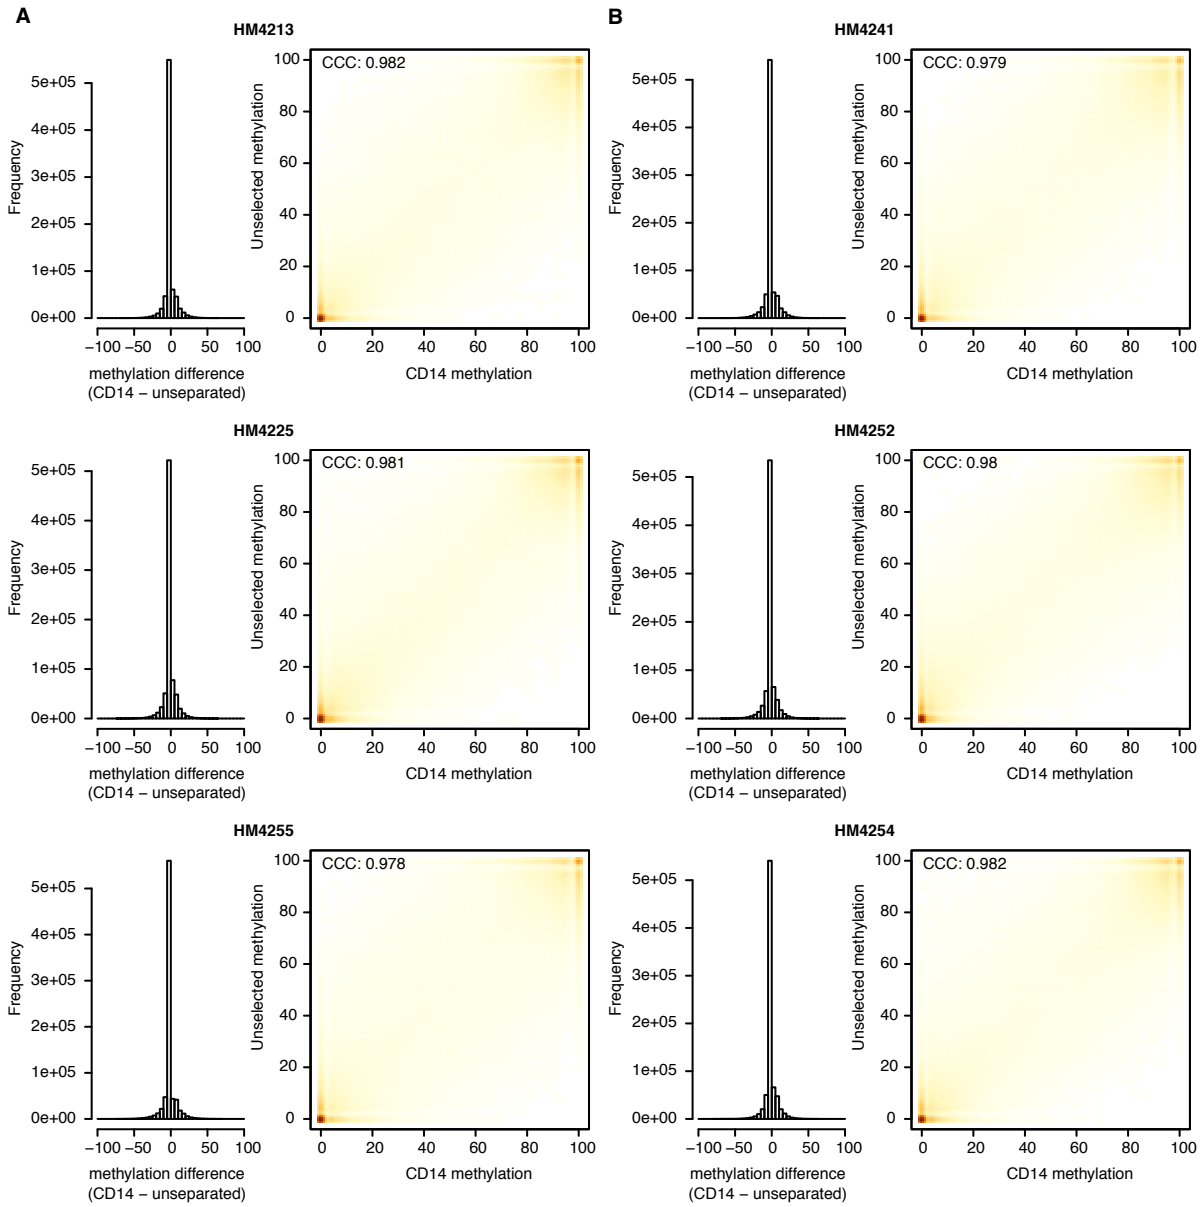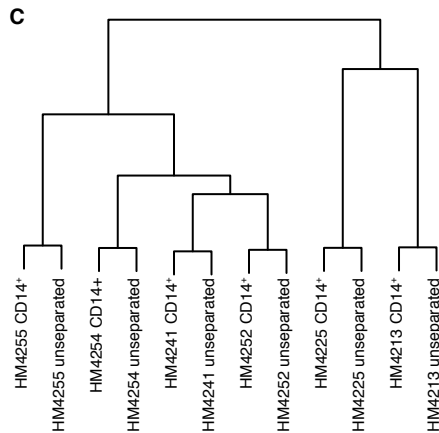

**Supplementary Figure 1. Pilot methylation study results.** (A) Concordance plots for three JMML patients comparing CD14<sup>+</sup> and unselected cells from the same patients. (B) Concordance plots for three age-appropriate controls comparing CD14<sup>+</sup> and unselected cells from the same subjects. (C) unsupervised clustering analysis of all six subjects using CD14<sup>+</sup> and unselected cells.

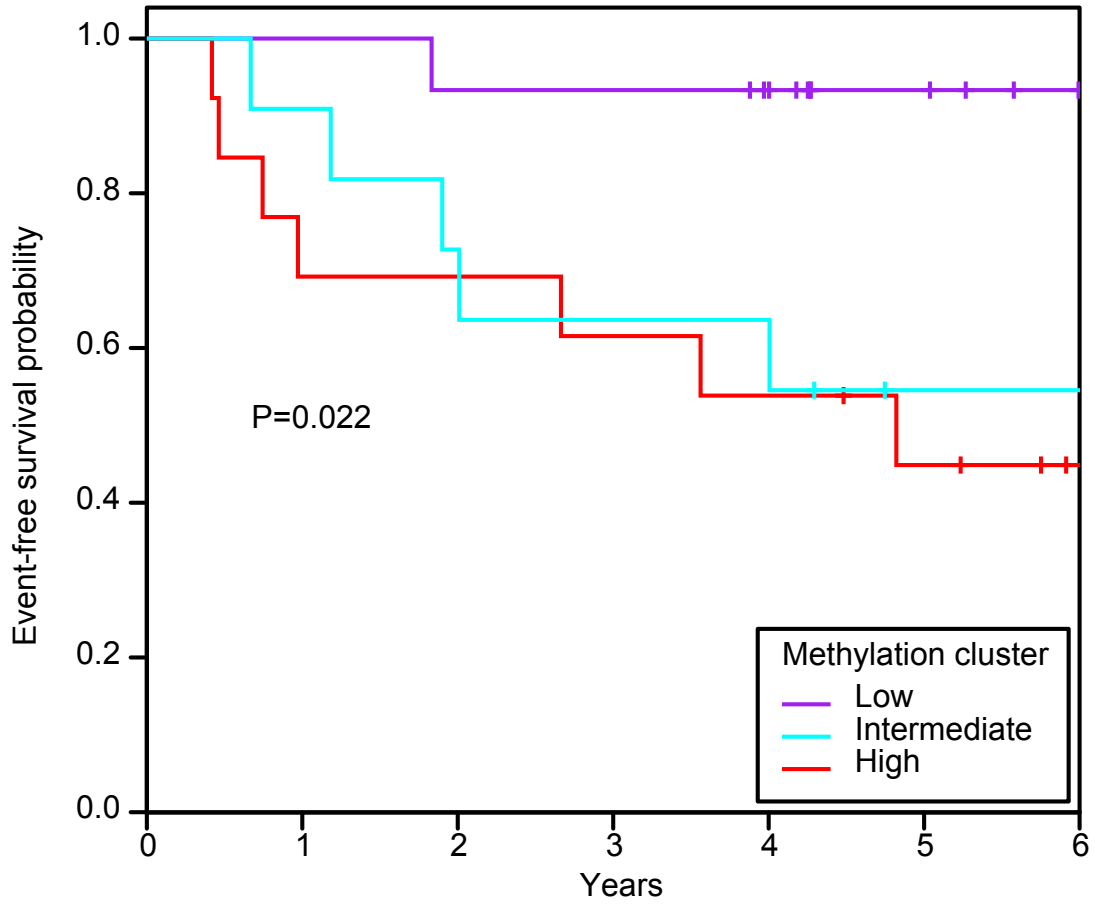

**Supplementary Figure 2. Event Free Survival (EFS) based on methylation cluster.** Patients with different methylation cluster designations had distinct outcomes ( $p=0.0039$ ).

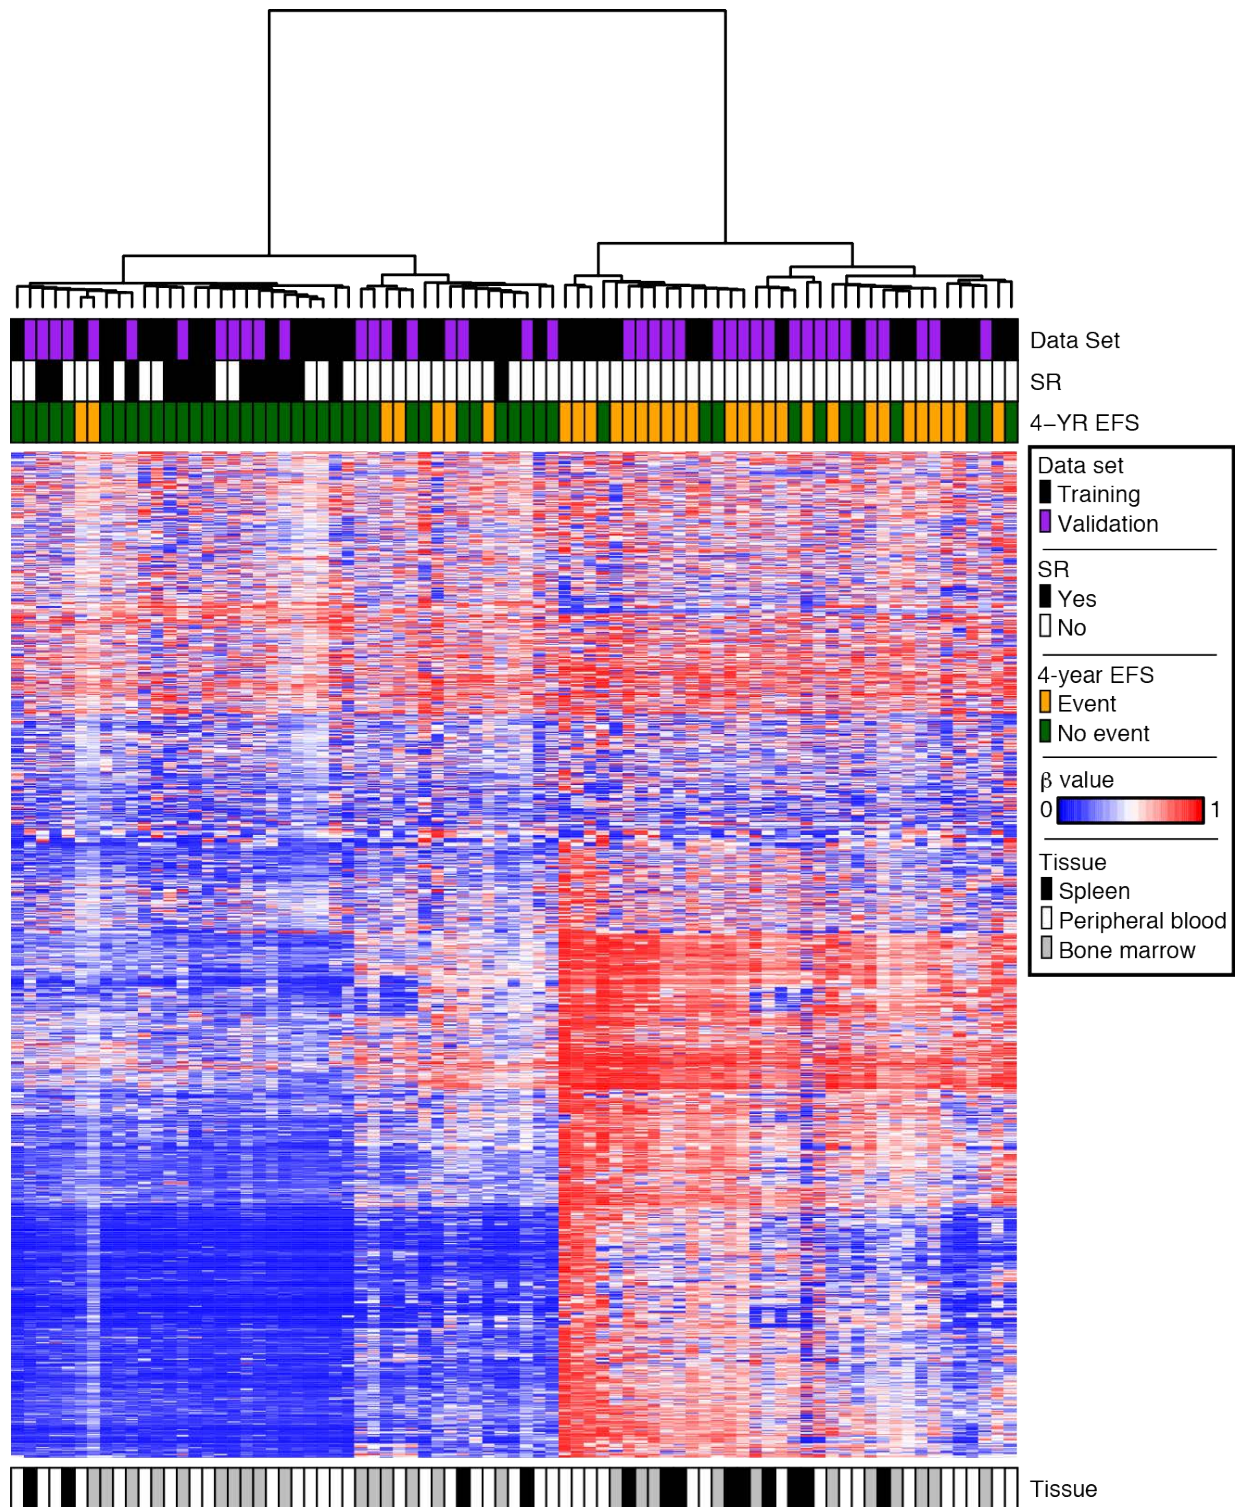

**Supplementary Figure 3. Unsupervised clustering analysis of all JMML patients.** Seventy-nine patients from both the discovery and validation cohorts are included. Tissue source for each sample is displayed on the bottom of the figure.

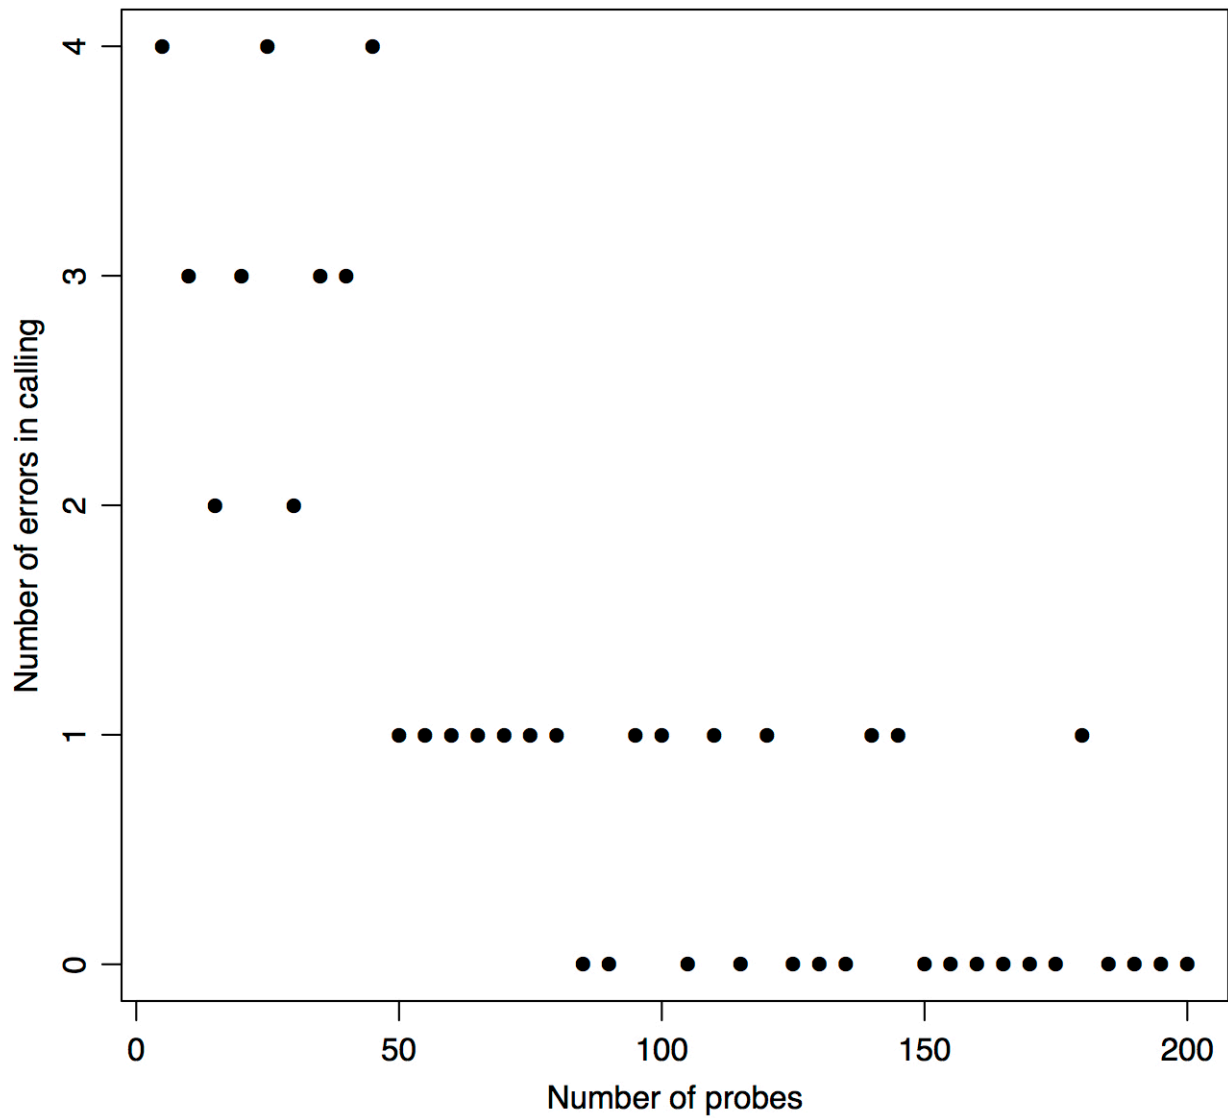

**Supplementary Figure 4. Minimum number of CpGs required to distinguish low/intermediate/high methylation clusters.** Using at least 50 CpG probes, the number of errors in classifying the validation cohort went down to either 0 or 1.

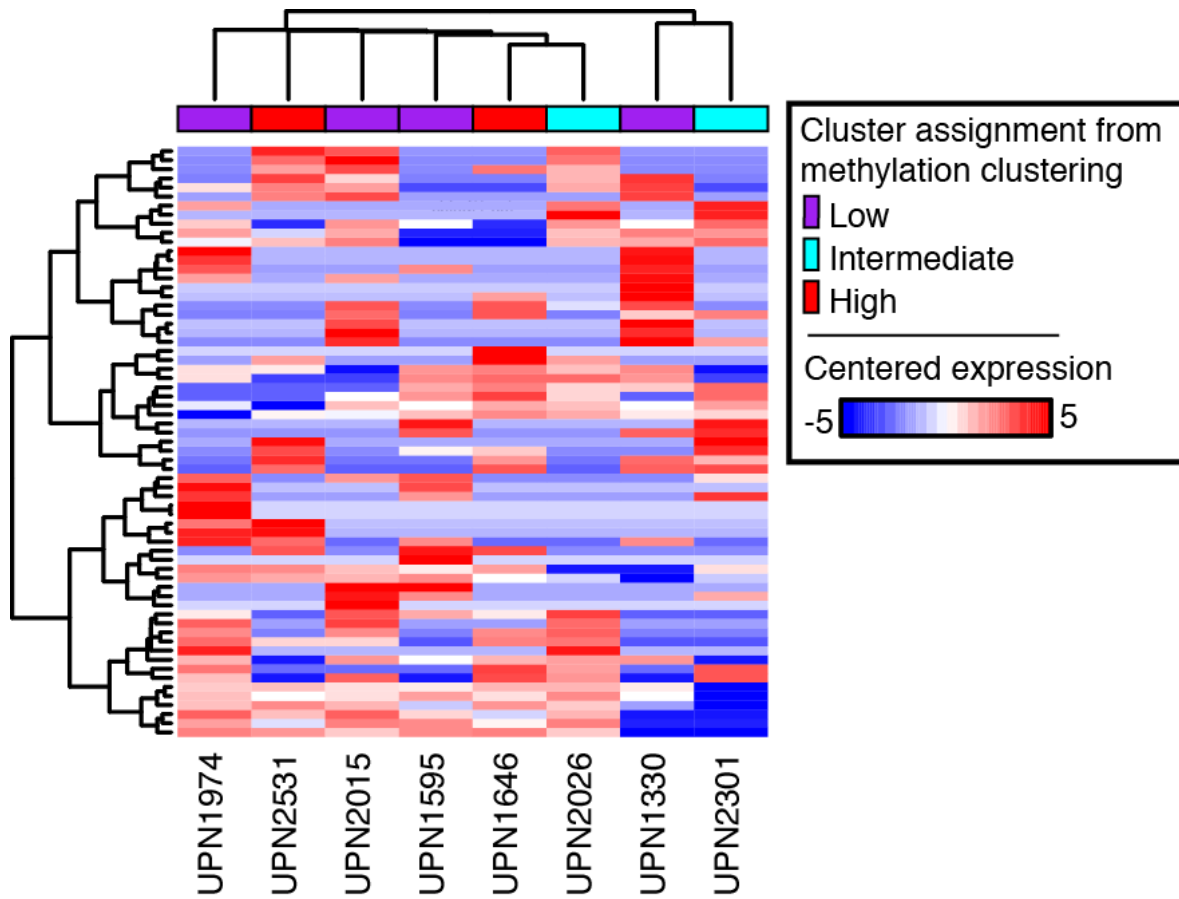

**Supplementary Figure 5. Unsupervised clustering using RNA sequencing data.**

We clustered the expression data based on the genes that annotated to the most variable CpG probes, JMML patients did not cluster into the low, intermediate and high clusters seen with DNA methylation.

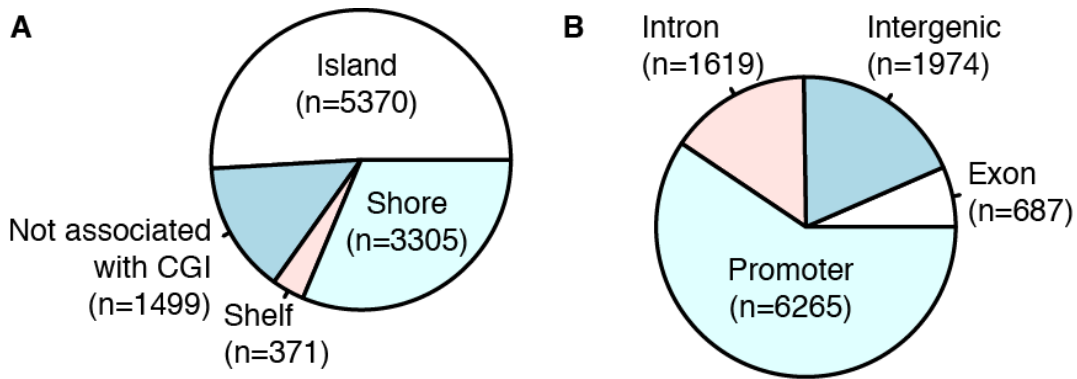

**Supplementary Figure 6. Distribution of significantly differentially methylated CpG sites.** The distribution of the 10,545 CpG sites that were differentially methylated between patients that do or do not have an event relative to (A) CpG islands and (B) gene space. When a CpG site was associated with multiple genes/transcripts, priority was assigned as follows: promoter > exon > intron > intergenic.

**Supplementary Table 1.** Mutation status in progenitor cells.

| <b>UPN</b> | <b>Tissue Source</b> | <b>Spontaneous Remission</b> | <b>Protein Alteration</b> | <b>HSC</b> | <b>MPP</b> | <b>CMP</b> | <b>GMP</b> |
|------------|----------------------|------------------------------|---------------------------|------------|------------|------------|------------|
| 1330       | BM                   | Yes                          | NRAS p.G12S               | Yes        | Yes        | Yes        | Yes        |
| 1383       | BM                   | No                           | SETBP1 p.G870S            | Yes        | Yes        | Yes        | Yes        |
| 1778       | BM                   | Yes                          | CBL p.Y371N               | Yes        | Yes        | Yes        | Yes        |
| 2531       | BM                   | No                           | PTPN11 p.E69K             | Yes        | Yes        | Yes        | Yes        |

**Supplementary Table 2.** Allelic fraction of driver mutations in different cellular subsets.

| <b>Patient</b> | <b>Mutation</b> | <b>Allelic Fraction in Mononuclear Cells</b> | <b>Allelic Fraction in CD3+ Cells</b> | <b>Allelic Fraction in CD14+ Cells</b> | <b>Allelic Fraction in CD19+ Cells</b> | <b>Allelic Fraction in CD34+ Cells</b> |
|----------------|-----------------|----------------------------------------------|---------------------------------------|----------------------------------------|----------------------------------------|----------------------------------------|
| UPN2570        | PTPN11 p.D61Y   | 0.44                                         | 0.17                                  | 0.50                                   | 0.48                                   | 0.44                                   |
| UPN2567        | KRAS p.G12D     | 0.40                                         | 0.06                                  | 0.49                                   | 0.26                                   | 0.45                                   |
| UPN2566        | KRAS p.G12D     | 0.45                                         | 0.06                                  | 0.52                                   | 0.47                                   | 0.44                                   |



**Supplementary Table 3.** Clinical, genomic and outcome characteristics of discovery cohort.

|                                                   |               |
|---------------------------------------------------|---------------|
| No. Patients                                      | 39            |
| Median Age, Months (range)                        | 17 (1-87)     |
| Gender (%)                                        |               |
| Male                                              | 28 (72)       |
| Female                                            | 11 (28)       |
| Blood counts                                      |               |
| Median WBC Count x10 <sup>9</sup> /L (range)      | 28.3 (9-109)  |
| Median Platelet Count x10 <sup>9</sup> /L (range) | 59.0 (10-189) |
| Fetal hemoglobin (%)                              |               |
| Elevated                                          | 21 (54)       |
| Not Elevated                                      | 17 (44)       |
| Unknown                                           | 1 (3)         |
| GM-CSF Hypersensitivity (%)                       |               |
| Yes                                               | 25 (64)       |
| No                                                | 7 (18)        |
| Not Done                                          | 7 (18)        |
| Monosomy 7 (%)                                    |               |
| Yes                                               | 2 (5)         |
| No                                                | 37 (95)       |
| Driver Mutation Status (%)                        |               |
| <i>PTPN11</i>                                     | 13 (33)       |
| <i>NF1</i>                                        | 8 (21)        |
| <i>NRAS</i>                                       | 7 (18)        |
| <i>KRAS</i>                                       | 6 (15)        |
| <i>CBL</i>                                        | 6 (15)        |
| <i>SH2B3</i>                                      | 1 (3)         |
| Secondary Mutation Status (%)                     |               |
| <i>SETBP1</i>                                     | 5 (13)        |
| <i>ASXL1</i>                                      | 2 (5)         |
| <i>JAK3</i>                                       | 2 (5)         |
| <i>DNMT3A</i>                                     | 1 (3)         |
| <i>GATA2</i>                                      | 1 (3)         |
| <i>PTPN11</i>                                     | 1 (3)         |
| <i>ZRSR2</i>                                      | 1 (3)         |
| <i>SH2B3</i>                                      | 1 (3)         |
| Treatment (%)                                     |               |
| Transplant                                        | 31 (80)       |
| Observation                                       | 7 (18)        |
| Chemotherapy                                      | 1 (3)         |
| Event Free Status (%)                             |               |
| Remission                                         | 25 (64)       |
| Relapse                                           | 14 (36)       |
| Overall Outcome (%)                               |               |
| Alive                                             | 27 (70)       |
| Deceased                                          | 12 (31)       |

**Supplementary Table 4.** Secondary mutations and cluster status.

| UPN     | Driver Mutation(s) | Driver Allelic Burden | Secondary Mutation(s)                            | Secondary Mutation Allelic Burden(s) | Methylation Cluster |
|---------|--------------------|-----------------------|--------------------------------------------------|--------------------------------------|---------------------|
| UPN0906 | PTPN11 p.E76K      | 0.57                  | ASXL1 p.E727*                                    | 0.35                                 | High                |
| UPN0969 | NF1 p.T1972fs      | 0.88                  | NRAS p.G12V                                      | 0.40                                 | High                |
| UPN1383 | NF1 p.R681*        | 0.59                  | SETBP1p.G870S                                    | 0.12                                 | Intermediate        |
| UPN1431 | KRAS p.Q61L        | 0.49                  | SETBP1 p.D868N                                   | 0.48                                 | High                |
| UPN1447 | PTPN11 p.E76k      | 0.30                  | DNMT3A p.G707fs                                  | 0.16                                 | High                |
| UPN1484 | PTPN11p.G60R       | 0.49                  | NF1 p.T676fs, NF1 p.R1534*                       | 0.5, 0.06                            | High                |
| UPN1603 | PTPN11 p.G503V     | 0.51                  | JAK3 p.R657Q                                     | 0.51                                 | High                |
| UPN1646 | NRAS p.G12D        | 0.44                  | ZRSR2 p.G179E                                    | 0.90                                 | High                |
| UPN1711 | NF1 p.N339fs       | 0.99                  | SETBP1 p.G870S, ASXL1 p.H630fs,<br>GATA2 p.N317S | 0.56, 0.45, 0.58                     | High                |
| UPN1875 | PTPN11 p.E76K      | 0.35                  | SETBP1 p.I871T                                   | 0.34                                 | High                |
| UPN2301 | KRAS p.G13D        | 0.19                  | SETBP1 p.D868N                                   | 0.29                                 | Intermediate        |
| UPN2531 | PTPN11 p.E69K      | 0.39                  | SH2B3 p.W262*, SH2B3 p.H414fs                    | 0.35, 0.40                           | High                |

**Supplementary Table 5.** Multivariable analysis.

| Multiivariable Analysis        | EFS from date of diagnosis |       |               |              |
|--------------------------------|----------------------------|-------|---------------|--------------|
|                                | N                          | OR    | 95% CI        | p            |
| Age at diagnosis (months)      |                            |       |               | 0.12         |
| ≤12 months                     | 17                         | 1     |               |              |
| >12 months                     | 22                         | 3.594 | 0.36-44.974   |              |
| Cluster                        |                            |       |               | <b>0.032</b> |
| Low                            | 15                         | 1     |               |              |
| Intermediate                   | 11                         | 2.312 | 0.069-79.599  |              |
| High                           | 13                         | 7.94  | 0.833-186.27  |              |
| Somatic Mutations at Diagnosis |                            |       |               | <b>0.018</b> |
| ≤1                             | 27                         | 1     |               |              |
| >1                             | 12                         | 7.121 | 0.725-169.968 |              |

**Supplementary Table 6.** Characteristics of validation cohort.

| UPN    | Array ID            | Treatment | Outcome   | Mutation | Tissue | Cluster      |
|--------|---------------------|-----------|-----------|----------|--------|--------------|
| 1578   | 200397860087_R02C02 | HSCT      | Remission | NF1      | PB     | Intermediate |
| 1786   | 200277210006_R01C01 | HSCT      | Remission | None     | PB     | High         |
| 4233   | 9444374126_R05C01   | HSCT      | Relapse   | NF1      | Spleen | High         |
| 4421   | 9444374124_R02C02   | HSCT      | Remission | None     | Spleen | Low          |
| 4587   | 9444374124_R03C01   | HSCT      | Relapse   | NF1      | Spleen | High         |
| 4645   | 9444374124_R04C01   | HSCT      | Relapse   | NRAS     | Spleen | Intermediate |
| 5377   | 9444374126_R06C01   | HSCT      | Relapse   | PTPN11   | Spleen | High         |
| 5417   | 9444374126_R01C02   | HSCT      | Relapse   | PTPN11   | Spleen | High         |
| 5628   | 9444374124_R03C02   | HSCT      | Remission | KRAS     | Spleen | Low          |
| 6162   | 9444374124_R05C01   | HSCT      | Relapse   | KRAS     | Spleen | High         |
| 6265   | 9444374126_R03C01   | HSCT      | Remission | None     | Spleen | High         |
| 6307   | 9444374124_R01C01   | HSCT      | Remission | PTPN11   | Spleen | Intermediate |
| 6624   | 200397860087_R04C01 | None      | Remission | CBL      | BM     | Low          |
| 12600  | 9444374126_R02C02   | HSCT      | Relapse   | KRAS     | Spleen | High         |
| 99889  | 200078650239_R01C02 | HSCT      | Remission | KRAS     | BM     | Intermediate |
| 105214 | 200397860086_R01C01 | None      | Remission | NRAS     | BM     | Low          |
| 107530 | 200277210006_R02C01 | None      | Remission | CBL      | BM     | Low          |
| 112029 | 200277210006_R03C01 | HSCT      | Relapse   | NRAS     | BM     | High         |
| 122865 | 200277210006_R01C02 | None      | Remission | CBL      | BM     | Low          |
| 125513 | 200397860089_R02C01 | HSCT      | Relapse   | PTPN11   | BM     | High         |
| 140211 | 200078650239_R03C02 | HSCT      | Remission | NF1      | BM     | Intermediate |
| 140251 | 200397860100_R01C01 | HSCT      | Relapse   | KRAS     | BM     | Low          |
| 141302 | 200397860086_R05C01 | HSCT      | Relapse   | PTPN11   | BM     | Intermediate |
| 143828 | 200078650182_R06C02 | None      | Remission | NRAS     | BM     | Low          |
| 153038 | 200277210018_R03C01 | HSCT      | Remission | KRAS     | BM     | Intermediate |
| 153843 | 200277210018_R04C01 | HSCT      | Remission | None     | BM     | Intermediate |
| 161112 | 200078650182_R05C02 | HSCT      | Remission | PTPN11   | PB     | High         |
| 163365 | 200277210018_R01C02 | HSCT      | Relapse   | PTPN11   | BM     | Intermediate |
| 163735 | 9444374126_R01C01   | HSCT      | Remission | KRAS     | Spleen | Intermediate |
| 163946 | 200277210018_R02C02 | HSCT      | Relapse   | PTPN11   | BM     | High         |
| 167550 | 9444374124_R06C02   | HSCT      | Relapse   | KRAS     | Spleen | High         |
| 175209 | 200078650239_R03C01 | HSCT      | Remission | PTPN11   | BM     | High         |
| 177314 | 200397860089_R04C02 | None      | Remission | NRAS     | PB     | Low          |
| 178394 | 200277210055_R02C01 | HSCT      | Relapse   | None     | BM     | High         |
| 185028 | 200397860089_R03C01 | HSCT      | Relapse   | PTPN11   | BM     | High         |
| 186428 | 200277210006_R04C01 | HSCT      | Remission | NRAS     | BM     | Low          |
| 189363 | 200078650239_R01C01 | HSCT      | Relapse   | NRAS     | PB     | Intermediate |
| 191048 | 200397860089_R04C01 | HSCT      | Relapse   | PTPN11   | BM     | High         |
| 195753 | 200397860089_R02C02 | None      | Remission | NRAS     | PB     | Low          |
| 206021 | 200277210044_R06C02 | HSCT      | Remission | NRAS     | BM     | Low          |

**Supplementary Table 7. KEGG Pathway Enrichment Using Only DNA Methylation Data.**

ko01100 Metabolic pathways (70)  
ko04080 Neuroactive ligand-receptor interaction (60)  
ko05200 Pathways in cancer (47)  
ko04024 cAMP signaling pathway (34)  
ko04020 Calcium signaling pathway (32)  
ko05202 Transcriptional misregulation in cancer (28)  
ko04360 Axon guidance (27)  
ko04151 PI3K-Akt signaling pathway (25)  
ko04010 MAPK signaling pathway (24)  
ko04014 Ras signaling pathway (23)  
ko04022 cGMP-PKG signaling pathway (23)

**Supplementary Table 8. KEGG Pathway Enrichment using Overlapping LIMMA Analyses.**

ko05202 Transcriptional misregulation in cancer (3)

ko04014 Ras signaling pathway (2)

ko05200 Pathways in cancer (2)

ko04914 Progesterone-mediated oocyte maturation (1)

ko04550 Signaling pathways regulating pluripotency of stem cells (1)

ko05165 Human papillomavirus infection (1)

ko04514 Cell adhesion molecules (CAMs) (1)

ko04024 cAMP signaling pathway (1)

ko05212 Pancreatic cancer (1)

**Supplementary Table 9.** Individual clinical characteristics of discovery cohort.

| UPN     | Array ID          | Treatment | Outcome   | Mutation      | Tissue | Cluster      |
|---------|-------------------|-----------|-----------|---------------|--------|--------------|
| UPN0424 | 9761749076_R01C01 | HSCT      | Remission | <i>PTPN11</i> | BM     | Low          |
| UPN0647 | 9761749080_R02C01 | HSCT      | Remission | <i>NRAS</i>   | BM     | High         |
| UPN0868 | 9482801069_R01C01 | HSCT      | Remission | <i>PTPN11</i> | PB     | Intermediate |
| UPN0906 | 9482801069_R02C01 | HSCT      | Relapse   | <i>PTPN11</i> | PB     | High         |
| UPN0969 | 9761749076_R02C01 | HSCT      | Relapse   | <i>NF1</i>    | PB     | High         |
| UPN1043 | 9482801069_R03C01 | HSCT      | Relapse   | <i>PTPN11</i> | PB     | Low          |
| UPN1142 | 9482801069_R04C01 | HSCT      | Remission | <i>PTPN11</i> | PB     | Intermediate |
| UPN1199 | 9482801069_R05C01 | HSCT      | Remission | <i>KRAS</i>   | PB     | Intermediate |
| UPN1312 | 9482801069_R06C01 | HSCT      | Relapse   | <i>KRAS</i>   | PB     | Intermediate |
| UPN1330 | 9482801069_R01C02 | None      | Remission | <i>NRAS</i>   | PB     | Low          |
| UPN1333 | 9761749076_R05C01 | HSCT      | Relapse   | <i>CBL</i>    | PB     | Intermediate |
| UPN1348 | 9761749080_R03C01 | None      | Remission | <i>KRAS</i>   | BM     | Intermediate |
| UPN1383 | 9761749087_R01C01 | HSCT      | Relapse   | <i>NF1</i>    | BM     | Intermediate |
| UPN1431 | 9482801069_R02C02 | HSCT      | Relapse   | <i>KRAS</i>   | PB     | High         |
| UPN1447 | 9482801069_R03C02 | HSCT      | Relapse   | <i>PTPN11</i> | PB     | High         |
| UPN1484 | 9761749080_R04C01 | HSCT      | Relapse   | <i>PTPN11</i> | PB     | High         |
| UPN1550 | 9482801069_R04C02 | None      | Remission | <i>NRAS</i>   | PB     | Low          |
| UPN1595 | 9482801069_R05C02 | HSCT      | Remission | <i>NRAS</i>   | PB     | Low          |
| UPN1603 | 9761749080_R05C01 | HSCT      | Remission | <i>PTPN11</i> | PB     | High         |
| UPN1646 | 9761749087_R02C01 | HSCT      | Remission | <i>NRAS</i>   | PB     | High         |
| UPN1711 | 9482801024_R01C01 | HSCT      | Relapse   | <i>NF1</i>    | PB     | High         |
| UPN1740 | 9482801024_R02C01 | HSCT      | Remission | <i>KRAS</i>   | PB     | High         |
| UPN1778 | 9482801024_R03C01 | None      | Remission | <i>CBL</i>    | BM     | Low          |
| UPN1804 | 9761749080_R06C01 | None      | Remission | <i>NF1</i>    | PB     | Low          |
| UPN1875 | 9761749087_R03C01 | HSCT      | Relapse   | <i>PTPN11</i> | PB     | High         |
| UPN1941 | 9482801024_R04C01 | HSCT      | Remission | <i>PTPN11</i> | PB     | High         |
| UPN1970 | 9761749087_R04C01 | HSCT      | Remission | <i>SH2B3</i>  | PB     | Low          |
| UPN1974 | 9761749087_R05C01 | HSCT      | Remission | <i>None</i>   | PB     | Low          |
| UPN2015 | 9482801024_R05C01 | None      | Remission | <i>NRAS</i>   | PB     | Low          |
| UPN2025 | 9482801024_R06C01 | None      | Remission | <i>CBL</i>    | PB     | Low          |
| UPN2026 | 9761749087_R06C01 | HSCT      | Relapse   | <i>PTPN11</i> | PB     | Intermediate |
| UPN2056 | 9761749087_R01C02 | None      | Remission | <i>CBL</i>    | PB     | Low          |
| UPN2099 | 9482801069_R06C02 | HSCT      | Remission | <i>NRAS</i>   | PB     | Low          |
| UPN2178 | 9482801024_R01C02 | HSCT      | Remission | <i>CBL</i>    | PB     | Low          |
| UPN2301 | 9761749087_R02C02 | HSCT      | Remission | <i>KRAS</i>   | PB     | Intermediate |
| UPN2309 | 9482801024_R03C02 | HSCT      | Remission | <i>CBL</i>    | PB     | Low          |
| UPN2497 | 9482801024_R04C02 | HSCT      | Remission | <i>PTPN11</i> | PB     | Intermediate |
| UPN2528 | 9482801024_R02C02 | HSCT      | Relapse   | <i>NF1</i>    | PB     | Intermediate |
| UPN2531 | 9482801024_R05C02 | HSCT      | Relapse   | <i>PTPN11</i> | BM     | High         |

Abbreviations: UPN, universal patient number; HSCT, hematopoietic stem cell transplantation; BM, bone marrow; PB, peripheral blood.

**Supplementary Table 10.** Characteristics of samples used for pilot sorted cell methylation data shown in Supplementary Figure 1.

| <b>Patient</b> | <b>Disease Status</b> | <b>Sample</b> | <b>Tissue Source</b> | <b>Age (months)</b> |
|----------------|-----------------------|---------------|----------------------|---------------------|
| UPN2570        | JMML                  | HM4225        | Peripheral Blood     | 26                  |
| UPN2567        | JMML                  | HM4213        | Peripheral Blood     | 6                   |
| UPN2566        | JMML Healthy          | HM4255        | Peripheral Blood     | 23                  |
| UPN2576        | Control Healthy       | HM4241        | Bone Marrow          | 12                  |
| UPN2205        | Control Healthy       | HM4252        | Peripheral Blood     | 42                  |
| UPN2516        | Control               | HM4254        | Bone Marrow          | 30                  |



**Supplementary Table 11.** Characteristics of samples used for RNA sequencing shown in Supplementary Figure 6.

| <b>Patient</b> | <b>Disease Status</b> | <b>Sample</b> | <b>Methylation Cluster</b> | <b>Outcome</b> |
|----------------|-----------------------|---------------|----------------------------|----------------|
| UPN1330        | JMML                  | HM1989        | Low                        | Remission      |
| UPN1595        | JMML                  | HM2414        | Low                        | Remission      |
| UPN1646        | JMML                  | HM2494        | High                       | Remission      |
| UPN1974        | JMML                  | HM3068        | Low                        | Remission      |
| UPN2015        | JMML                  | HM3134        | Low                        | Remission      |
| UPN2026        | JMML                  | HM3158        | Intermediate               | Relapse        |
| UPN2301        | JMML                  | HM3679        | Intermediate               | Remission      |
| UPN2531        | JMML                  | HM4155        | High                       | Relapse        |
